# Supplementary material
Source: PubMed Central journal article supplement (PMC6078384)
Supplement: NIHMS979461-supplement-SI.pdf [file NIHMS979461-supplement-SI.pdf]

## **SUPPLEMENTARY INFORMATION**

### **High-resolution crystal structure of the eukaryotic HMP-P synthase (THIC) from *Arabidopsis thaliana*.**

Sandrine Coquille<sup>1</sup>, Céline Roux<sup>2</sup>, Angad Mehta<sup>3</sup>, Tadhg P. Begley<sup>3</sup>, Teresa B. Fitzpatrick<sup>2</sup> & Stéphane Thore<sup>1,\*</sup>

#### **Supplementary materials and methods:**

##### **HPLC conditions for THIC activity assays:**

An Agilent 1260 HPLC was used for detection and separation of the reaction intermediates and products employing a LC-18 column (Supelcosil<sup>TM</sup>, 25 cm x 10 mm, 5 µm). The buffers employed were Buffer A, water; Buffer B, 100 mM potassium phosphate, pH 6.6; Buffer C, methanol and were used under the following gradient: 0 min - 100% buffer B; 7 mins - 10% buffer A, 90% buffer B; 12 min - 25% buffer A, 60% buffer B, 15% buffer C; 17 min - 25% buffer A, 10% buffer B, 65% buffer C; 19 min - 100% buffer B, 29 min - 100% buffer A.

##### **Liquid Chromatography Mass Spectrometry (LC-MS) parameters for 5'-deoxyadenosine and HMP-P characterization:**

Liquid Chromatography - ElectroSpray Ionization - Time Of Flight - Mass Spectrometry (LC-ESI-TOF-MS) analysis was performed using an Agilent 1260 HPLC system equipped with a binary pump, an autosampler and a 1200 diode array detector upstream of a MicroToF-Q II mass spectrometer (Bruker Daltonics) using the ESI source in positive ionization mode.

The buffers used were Buffer A, 20 mM *N,N*-dimethylhexylamine and 10 mM ammonium acetate, pH 6.4; Buffer B, 75% methanol and 25% water. The column used was an Agilent Poroshell 120 LC18-T (Supelcosil – 15 cm x 3 mm, 3 µm). The LC gradients used for the purification were the following: 0 min - 100% buffer A; 5 min - 100% buffer A; 15 min - 60% buffer A, 40% buffer B; 27 min - 10% buffer A, 90% buffer B; 36 min - 100% buffer A. The following parameters were used for the mass spectrometry measurements: Capillary, -4500 V; Capillary offset, -500 V; Nebulizer gas, 3.0 bar; Dry gas, 10.0 L/min; Dry gas temperature, 200°C; Funnel 1 RF, 200.0 Vpp; Funnel 2 RF, 250.0 Vpp; ISCID, 0.0 eV; Hexapole RF, 150 Vpp; Quadrupole, Ion energy, 5.0 eV; Low mass, 80 *m/z*; Collision cell, collision energy, 10.0 eV; Collision RF, 150.0 Vpp, Transfer time, 100.0 µs; Prepulse storage, 5.0 µs. Data was processed with DataAnalysis ver. 4.0 SP4 (Bruker Daltonics).

### **Inductively Coupled Plasma - Mass Spectrometry (ICP-MS) quantitation for magnesium, iron, nickel and zinc:**

The concentrations of the elements Mg, Fe, Ni and Zn were determined on a 7700x inductively coupled plasma mass spectrometer (Agilent Technologies, France) in no gas, helium and/or high-energy helium mode(s). The purified protein samples at 0.3 mM concentration in 20 mM Hepes, pH 7.5, containing 150 mM NaCl, 1 mM  $\beta$ -mercaptoethanol and 10% (v/v) glycerol) were diluted 100 times in 2% suprapur nitric acid (VWR, Switzerland). Internal standardization was used to overcome concentration or matrix effects. External calibration was applied using standard solutions of single elements ranging from 1 to 500  $\mu$ g/L (SCP Science, France). The protein sample was analyzed four times. The accuracy of the method was determined on the basis of the mean values obtained on certified reference materials SRM 1643e and LPCS-01R-5 (TechLab, France). The limits of detection (LOD) were calculated as three standard deviations added to the mean value of the background signal obtained on 10 Blank samples. The limits of quantitation (LOQ) were calculated by multiplying the LOD by a factor of 3.3.

### **Supplementary Figure Legends:**

**Supplementary Figure 1:** Purified  $\Delta$ N71-AtTHIC is dimeric as determined by size exclusion chromatography. The purified protein was separated on a Superdex 200 column (GE-Healthcare) equilibrated in 20 mM Hepes, pH 7.5, containing 150 mM NaCl, 1 mM  $\beta$ -mercaptoethanol and 10% (v/v) glycerol. The blue trace represents the absorbance at 280 nm (protein) and the one in red the absorbance at 254 nm (nucleic acid). Protein molecular mass standards are indicated with arrows to illustrate the approximate mass of the  $\Delta$ N71-AtTHIC-containing peak. The protein standards used were carbonic anhydrase (29 kDa), bovine serum albumin (66 kDa), alcohol dehydrogenase (150 kDa),  $\beta$ -amylase (200 kDa) and blue dextran (2000 kDa).

**Supplementary Figure 2:** Sequence alignment of THIC proteins from various species. The secondary structure of the *A. thaliana* THIC structure is indicated above the alignment ( $\alpha$ -helices are shown as springs and  $\beta$ -sheets as arrows). Fully conserved residues are highlighted in red while almost conserved residues (50-95%) are colored pink. Green stars show the residues responsible for the association with the substrate AIR, the blue stars for the metal ion and the purple stars for the iron-sulfur cluster binding residues. Sequences are as follows: *Acinetobacter baumannii*: ref YP\_001708358.1; *Agrobacterium tumefaciens*: gb EHJ96995.1; *Arabidopsis thaliana*: gb AEC08283.1; *Bacillus subtilis*: ref YP\_004206889.1; *Burkholderia sp.*: ref YP\_004228844.1; *Caulobacter crescentus*: gb ACL95574.1; *Escherichia coli*: ref YP\_002410258.1; *Flavobacteriia bacterium*: emb CCG00800.1; *Haliangium ochraceum*: ref YP\_003269601.1; *Halomonas boliviensis*: ref ZP\_09186661.1; *Leptospira*

*licerasiae*: ref ZP\_09260399.1; *Lotus japonicus*: gb AFK38853.1; *Oryza sativa*: ref NP\_001050897.1; *Phaeodactylum tricornutum*: ref XP\_002182146.1; *Physcomitrella patens*: ref XP\_001784371.1; *Populus trichocarpa*: ref XP\_002314121.1; *Pseudomonas stutzeri*: ref YP\_001174281.1; *Saccharomonospora viridis*: ref YP\_003135247.1; *Salmonella enterica*: ref ZP\_04657579.1; *Theilungiella halophila*: dbj BAJ34226.1; *Verrucomicrobium spinosum*: ref ZP\_02928035.1; *Volvox carteri*: ref XP\_002953184.1; *Zea mays*: ref NP\_001151805.1.

**Supplementary Table 1:** Inductively Coupled Plasma - Mass Spectrometry (ICP-MS) quantitation for magnesium, iron, nickel and zinc. Protein concentration was at 0.3 mM prior to its dilution for analysis. The buffer composition was 20 mM Hepes, pH 7.5, containing 150 mM NaCl, 1 mM  $\beta$ -mercaptoethanol and 10% (v/v) glycerol. Both samples were analyzed as indicated in the Materiel and Method section.

Supplementary Figure 1.

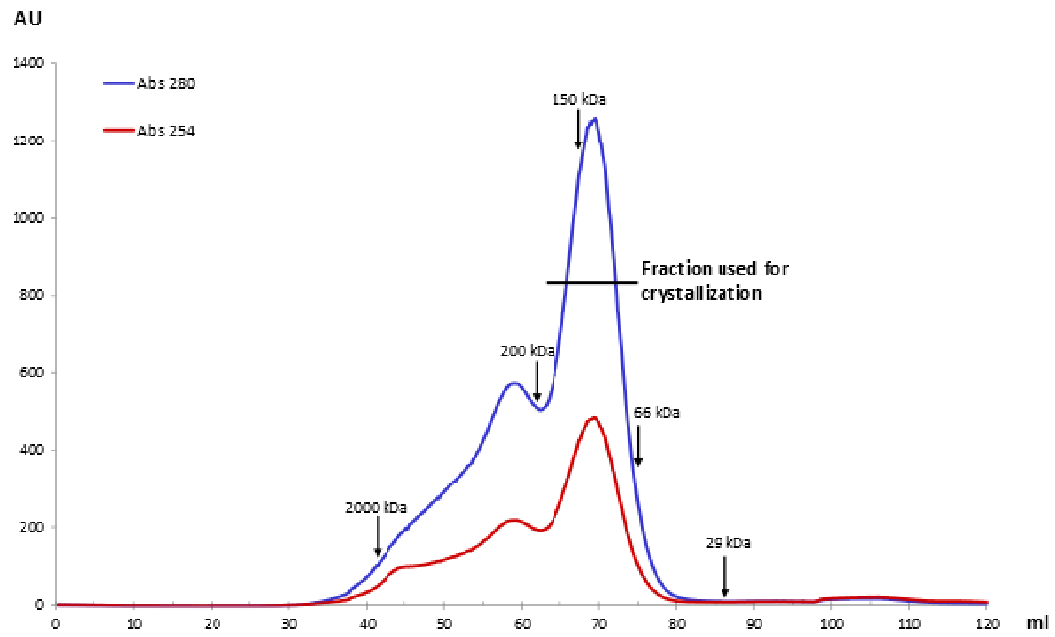

Supplementary Figure 2.

*A.thaliana*

|                         | 1  | 10                           | 20   | 30                           | 40              | 50           | 60        |           |
|-------------------------|----|------------------------------|------|------------------------------|-----------------|--------------|-----------|-----------|
| <i>A.thaliana</i>       | .. | MAASVHCTLMSVVCNNKNHSARPKLPNS | SLLP | GGFDV                        | VVQAAATR        | FKKETT       | ..        | TRATLTFDP |
| <i>T.halophila</i>      | .. | MASVHSTLMSVVCNNKNHSAWPKLPNS  | SLLP | GGFDVSVVQAAAVR               | SKKETT          | ..           | TRATLTFDP |           |
| <i>P.trichocarpa</i>    | .. | MAALQPSFSSAMAMKS             | ..   | LKLPKTAVLPGFGGIAR            | PQDVQDRSANFTCSR | PRAASVTDQ    | STABP     |           |
| <i>O.sativa</i>         | .. | MAALQPSFSPAMTLKSSCSA         | ..   | LKFPKTALLSGFGGIPRLQDAQDRNTSV | VAYLI           | PKAASVTDQ    | SIABP     |           |
| <i>Z.mays</i>           | .. | MAALQPSFSSAMAMKS             | ..   | LKLPKTAVLPGFGGIAR            | PQDVQDRSANFTCSR | PRAASVTDQ    | STABP     |           |
| <i>L.japonicus</i>      | .. | MAALQPSFSSAMAMKS             | ..   | LKLPKTAVLPGFGGIAR            | PQDVQDRSANFTCSR | PRAASVTDQ    | STABP     |           |
| <i>P.patens</i>         | .. | MAALQPSFSSAMAMKS             | ..   | LKLPKTAVLPGFGGIAR            | PQDVQDRSANFTCSR | PRAASVTDQ    | STABP     |           |
| <i>P.tricornutum</i>    | .. | MAGCHS                       | ..   | SMVNAPFRSVSRSLSPSRLAVLKD     | ..              | PQDLVTKBANVK | ..        |           |
| <i>V.spinousum</i>      | .. | MAALQPSFSSAMAMKS             | ..   | LKLPKTAVLPGFGGIAR            | PQDVQDRSANFTCSR | PRAASVTDQ    | STABP     |           |
| <i>B.subtilis</i>       | .. | MAALQPSFSSAMAMKS             | ..   | LKLPKTAVLPGFGGIAR            | PQDVQDRSANFTCSR | PRAASVTDQ    | STABP     |           |
| <i>H.boliviensis</i>    | .. | MAALQPSFSSAMAMKS             | ..   | LKLPKTAVLPGFGGIAR            | PQDVQDRSANFTCSR | PRAASVTDQ    | STABP     |           |
| <i>Burkholderia.sp.</i> | .. | MAALQPSFSSAMAMKS             | ..   | LKLPKTAVLPGFGGIAR            | PQDVQDRSANFTCSR | PRAASVTDQ    | STABP     |           |
| <i>P.stutzeri</i>       | .. | MAALQPSFSSAMAMKS             | ..   | LKLPKTAVLPGFGGIAR            | PQDVQDRSANFTCSR | PRAASVTDQ    | STABP     |           |
| <i>A.baumannii</i>      | .. | MAALQPSFSSAMAMKS             | ..   | LKLPKTAVLPGFGGIAR            | PQDVQDRSANFTCSR | PRAASVTDQ    | STABP     |           |
| <i>E.coli</i>           | .. | MAALQPSFSSAMAMKS             | ..   | LKLPKTAVLPGFGGIAR            | PQDVQDRSANFTCSR | PRAASVTDQ    | STABP     |           |
| <i>S.enterica</i>       | .. | MAALQPSFSSAMAMKS             | ..   | LKLPKTAVLPGFGGIAR            | PQDVQDRSANFTCSR | PRAASVTDQ    | STABP     |           |
| <i>F.bacterium</i>      | .. | MAALQPSFSSAMAMKS             | ..   | LKLPKTAVLPGFGGIAR            | PQDVQDRSANFTCSR | PRAASVTDQ    | STABP     |           |
| <i>A.tumefaciens</i>    | .. | MAALQPSFSSAMAMKS             | ..   | LKLPKTAVLPGFGGIAR            | PQDVQDRSANFTCSR | PRAASVTDQ    | STABP     |           |
| <i>C.crescentus</i>     | .. | MAALQPSFSSAMAMKS             | ..   | LKLPKTAVLPGFGGIAR            | PQDVQDRSANFTCSR | PRAASVTDQ    | STABP     |           |
| <i>S.viridis</i>        | .. | MAALQPSFSSAMAMKS             | ..   | LKLPKTAVLPGFGGIAR            | PQDVQDRSANFTCSR | PRAASVTDQ    | STABP     |           |
| <i>H.ochraceum</i>      | .. | MAALQPSFSSAMAMKS             | ..   | LKLPKTAVLPGFGGIAR            | PQDVQDRSANFTCSR | PRAASVTDQ    | STABP     |           |
| <i>L.licerasiae</i>     | .. | MAALQPSFSSAMAMKS             | ..   | LKLPKTAVLPGFGGIAR            | PQDVQDRSANFTCSR | PRAASVTDQ    | STABP     |           |
| <i>V.carteri</i>        | .. | MAALQPSFSSAMAMKS             | ..   | LKLPKTAVLPGFGGIAR            | PQDVQDRSANFTCSR | PRAASVTDQ    | STABP     |           |

*A.thaliana*

|                         | 70                 | 80 | 90            | 100 | 110               | 120             | T.T                  |
|-------------------------|--------------------|----|---------------|-----|-------------------|-----------------|----------------------|
| <i>A.thaliana</i>       | ERAKQKHTIDPSSP     | .. | DFQPIP        | ..  | SFEBCFPKSTKEHEK   | EVVHBEESGHV     | LKVPFRRVHLSG         |
| <i>T.halophila</i>      | ERAKQKHTIDPSSP     | .. | DFQPIP        | ..  | SFEBCFPKSTKEHESEI | VHBEETGHV       | LKVPFRRVHLSG         |
| <i>P.trichocarpa</i>    | RTNQKKHTVDPSSP     | .. | DFLPLP        | ..  | SFEBCFPKSTKEHREVK | HBEESGHV        | LKVPFRRVHLSG         |
| <i>O.sativa</i>         | AKPRQNKHTVDPSSAP   | .. | EFLPLP        | ..  | SFEBCFPKSTKEHREI  | VHBEESGHV       | LKVPFRRVHLSG         |
| <i>Z.mays</i>           | PKTKQNRHTVDPSTAP   | .. | EFLPLP        | ..  | SFEBCFPKSTKEHSEI  | IHEESGHV        | LKVPFRRVHLSG         |
| <i>L.japonicus</i>      | ..                 | .. | ..            | ..  | ..                | ..              | ..                   |
| <i>P.patens</i>         | HSAGRTRPTKDPAAP    | .. | DFKPIP        | ..  | SFEBCFPKSTKEI     | KEVVHBEETGS     | VLVQVPFRRVHLSG       |
| <i>P.tricornutum</i>    | PAGTRTKPTVDPFPNP   | .. | NFESIASV      | ..  | YNTAFPSSTKE       | KEYKTVVHEAT     | GHRLLHVPFRRVHLED     |
| <i>V.spinousum</i>      | VRVPMREIAVSPTKT    | .. | FSGKIBENAAVRV | ..  | YDCSGPWP          | GDPAFTGTABEG    | LPALRAKWIADRGD       |
| <i>B.subtilis</i>       | IQVPMREIALSPTTG    | .. | SFGE          | ..  | EENAPVRV          | YDTS            | SGPYTDP              |
| <i>H.boliviensis</i>    | IRVPMREIISLSPKT    | .. | TGIDEENPLLV   | ..  | YDTS              | SGPYTDPDAINDLR  | KG.LPALRRAWIEERDD    |
| <i>Burkholderia.sp.</i> | IRVPMREITQADTDP    | .. | SFGGEKNP      | ..  | YVYDTS            | SGPYSDPAKIDIRAG | LPALRQWIEERDDTEAL    |
| <i>P.stutzeri</i>       | IRVPMREISLDTPT     | .. | DFGGEINAPVT   | ..  | YDTS              | SGPYTDPNVITDVR  | KG.LADVRSAWIEDR      |
| <i>A.baumannii</i>      | IQVPMREIISLDTPT    | .. | GLGGEHNP      | ..  | YVYDTS            | SGPYTDPNVQIDLN  | KG.LPSVRQWIEERDDTEAL |
| <i>E.coli</i>           | IRVPMREIQLSPTLIGGS | .. | KQPQFENEAI    | ..  | YVYDTS            | SGPYGDPQIAINVQ  | QG.LAKLRQPWIDAR      |
| <i>S.enterica</i>       | IRVPMREIQLSPTLIGGS | .. | KDNQPENEAV    | ..  | YVYDTS            | SGPYGDPPEVAINVQ | LG.LAKLRQPWIDAR      |
| <i>F.bacterium</i>      | IKVPMRKINLADTV     | .. | KFNGKVEKNEP   | ..  | YVYDTS            | SGPYTDAKISIDV   | KG.LHPVRQWIDAR       |
| <i>A.tumefaciens</i>    | IRVPMREIAVHPTAG    | .. | ..            | ..  | ..                | ..              | ..                   |
| <i>C.crescentus</i>     | LRVPMREIAVHPSAN    | .. | ..            | ..  | ..                | ..              | ..                   |
| <i>S.viridis</i>        | LRVPMREIISLNGEH    | .. | ..            | ..  | ..                | ..              | ..                   |
| <i>H.ochraceum</i>      | VRVPMREIISLNGEP    | .. | ..            | ..  | ..                | ..              | ..                   |
| <i>L.licerasiae</i>     | FBIPRKEIRLSNGSV    | .. | ..            | ..  | ..                | ..              | ..                   |
| <i>V.carteri</i>        | ASPRQSVNRPPKND     | .. | ..            | ..  | ..                | ..              | ..                   |

*A.thaliana*

|                         | 130         | 140 | 150              | 160 | 170            | 180 |
|-------------------------|-------------|-----|------------------|-----|----------------|-----|
| <i>A.thaliana</i>       | PAPDNVYDTSG | ..  | PQNVNAHIGLAKLR   | ..  | KKEWIDRREKL    | ..  |
| <i>T.halophila</i>      | PAPDAYDTSG  | ..  | PQNVNPHVGLAKLR   | ..  | KKEWIDRREKL    | ..  |
| <i>P.trichocarpa</i>    | PGFDNYDTSG  | ..  | PQNI             | ..  | SPRVLGPKLRKEW  | ..  |
| <i>O.sativa</i>         | KHFDTYDTSG  | ..  | PQNI             | ..  | SPRIGLPIRKEW   | ..  |
| <i>Z.mays</i>           | KHFDTYDTSG  | ..  | PQNI             | ..  | SPRIGLPIRKEW   | ..  |
| <i>L.japonicus</i>      | ..          | ..  | ..               | ..  | ..             | ..  |
| <i>P.patens</i>         | PHFDTYDTSG  | ..  | PQKVNPRYGLPKLR   | ..  | KKEWIDRREAL    | ..  |
| <i>P.tricornutum</i>    | LYLDLYDTSG  | ..  | PQGVDPKGLAKLR    | ..  | QEWIDREBK      | ..  |
| <i>V.spinousum</i>      | DG          | ..  | REVKPQDNGYLSGKHA | ..  | YASKABERNRLIEF | ..  |
| <i>B.subtilis</i>       | EG          | ..  | RAIKKPEDNGYK     | ..  | ..             | ..  |
| <i>H.boliviensis</i>    | EG          | ..  | HTSEYGK          | ..  | ..             | ..  |
| <i>Burkholderia.sp.</i> | TG          | ..  | LTSDFYGR         | ..  | ..             | ..  |
| <i>P.stutzeri</i>       | PG          | ..  | LTSDFYGR         | ..  | ..             | ..  |
| <i>A.baumannii</i>      | SG          | ..  | LTSDFYGR         | ..  | ..             | ..  |
| <i>E.coli</i>           | TV          | ..  | RSSDYTK          | ..  | ..             | ..  |
| <i>S.enterica</i>       | DD          | ..  | RSSAYTK          | ..  | ..             | ..  |
| <i>F.bacterium</i>      | EG          | ..  | LSSAYGR          | ..  | ..             | ..  |
| <i>A.tumefaciens</i>    | DG          | ..  | RHVKPED          | ..  | ..             | ..  |
| <i>C.crescentus</i>     | ADPRQVKPED  | ..  | ..               | ..  | ..             | ..  |
| <i>S.viridis</i>        | ..          | ..  | ..               | ..  | ..             | ..  |
| <i>H.ochraceum</i>      | ..          | ..  | ..               | ..  | ..             | ..  |
| <i>L.licerasiae</i>     | ..          | ..  | ..               | ..  | ..             | ..  |
| <i>V.carteri</i>        | TDPVYDTSG   | ..  | PRVADPRQGLPKLR   | ..  | QPWVIRREAKGI   | ..  |

$\alpha 4$

A.thaliana 2200000  
180

A.thaliana LVCATREK.  
T.halophila LYCAAREK.  
P.trichocarpa LYCAAREK.  
O.satiba LYCATREN.  
Z.mays LYCASREN.  
L.japonicus  
P.patens AYCAAREK.  
P.tricornutum LYCATREN.  
V.spinolum EYIAIRENMQVALASSQCQQQASSLRIADQKDDILRNDLHKQHAGSTQLGTGNPYTPSIFGRFPQRIPTB  
B.subtilis EYIAIRENMQVALASSQCQQQASSLRIADQKDDILRNDLHKQHAGSTQLGTGNPYTPSIFGRFPQRIPTB  
H.boliviensis EYIAIRENMQRRR...QALGT...AEVERILGHQHPGQS.FGASLP...EE  
Burkholderia.sp. EYIAIRENMQRRAY...LESLKTSGFNGEKLAAAMMGRQHPPQA.FGASAFGPNV...TE  
P.stutzeri EYVAIRENMQKLAB...AREAGLVEQHQAGQS.FGAAIP...KE  
A.baumannii EYIAIRENMQRR...HEAVDMRQHPPQN.FGAKNL...KE  
E.coli EYIAIRENMQRRER...IRSEVLRHQHPGMS.FGARLP...BN  
S.enterica EYIAIRENMQRRER...IRSEVLRHQHPGMN.FGARLP...BN  
F.bacterium EYIAIRENMQKLAB...IQS...ISQHPGNS.YGASIP...KV  
A.tumefaciens EYIAIRENMQKLAB...AKKLLARDGES.FGAQIP...DY  
C.crescentus EYVAIRENMQRRER...DRP.CVRDGED.FGASIP...DF  
S.viridis EYIAARENMQRRER...  
H.ochraceum KPIALREGE...  
L.licerasiae KYVALREGE...  
V.carteri AFAAAREGE...

$\alpha 5$   $\beta 4$   $\beta 5$   $\beta 6$   $\alpha 6$   $\beta 7$

A.thaliana 2200000  
190 210 220 230 240 250

A.thaliana LDPFVRESEVARGRAIIPSNKKHLELEPMIVGRKFLVKVNIANSAVASSIEBEVYKQVWATMWGADTI  
T.halophila MDLPFVRESEVARGRAIIPSNKKHLELEPMIVGRKFLVKVNIANSAVASSIEBEVYKQVWATMWGADTI  
P.trichocarpa LDPFVRESEVARGRAIIPSNKKHLELEPMIVGRNFLVKVNIANSAVASSIEBEVYKQVWATMWGADTV  
O.satiba LSPFVRESEVARGRAIIPSNKRHLELEPMIVGRNFLVKVNIANSAVASSIEBEVYKQVWATMWGADTV  
Z.mays LSPFVRESEVARGRAIIPSNKRHLELEPMIVGRNFLVKVNIANSAVASSIEBEVYKQVWATMWGADTV  
L.japonicus  
P.patens MDPFVRESEVARGRAIIPSNKKHLELEPMIVGRKFLVKVNIANSAVASSIEBEVYKQVWATMWGADTI  
P.tricornutum MEPFVRESEVARGRAIIPSNKKHLELEPMIVGRKFLVKVNIANSAVASSIEBEVYKQVWATMWGADTI  
V.spinolum ITPFVRESEVARGRAIIPANINHPLEPMIIGRNFLVKVNIANSAVASSIEBEVYKQVWATMWGADTV  
B.subtilis VSPFVRESEVARGRAIIPANINHPLEPMIIGRNFLVKVNIANSAVASSIEBEVYKQVWATMWGADTV  
H.boliviensis ITPFVRESEVARGRAIIPANINHPLEPMIIGRNFLVKVNIANSAVASSIEBEVYKQVWATMWGADTI  
Burkholderia.sp. ITPFVRESEVARGRAIIPANINHPLEPMIIGRNFLVKVNIANSAVASSIEBEVYKQVWATMWGADTI  
P.stutzeri ITPFVRESEVARGRAIIPANINHPLEPMIIGRNFLVKVNIANSAVASSIEBEVYKQVWATMWGADTI  
A.baumannii ITPFVRESEVARGRAIIPANINHPLEPMIIGRNFLVKVNIANSAVASSIEBEVYKQVWATMWGADTI  
E.coli ITPFVRESEVARGRAIIPANINHPLEPMIIGRNFLVKVNIANSAVASSIEBEVYKQVWATMWGADTI  
S.enterica ITPFVRESEVARGRAIIPANINHPLEPMIIGRNFLVKVNIANSAVASSIEBEVYKQVWATMWGADTI  
F.bacterium ITPFVRESEVARGRAIIPANINHPLEPMIIGRNFLVKVNIANSAVASSIEBEVYKQVWATMWGADTI  
A.tumefaciens VTPFVRESEVARGRAIIPANINHPLEPMIIGRNFLVKVNIANSAVASSIEBEVYKQVWATMWGADTI  
C.crescentus VTPFVRESEVARGRAIIPANINHPLEPMIIGRNFLVKVNIANSAVASSIEBEVYKQVWATMWGADTI  
S.viridis VDPFVRESEVARGRAIIPANINHPLEPMIIGRNFLVKVNIANSAVASSIEBEVYKQVWATMWGADTI  
H.ochraceum LAAPFVRESEVARGRAIIPANINHPLEPMIIGRNFLVKVNIANSAVASSIEBEVYKQVWATMWGADTI  
L.licerasiae MDLPFVRESEVARGRAIIPSNKRHLELEPMIIGRNFLVKVNIANSAVASSIEBEVYKQVWATMWGADTI  
V.carteri LDPFVRESEVARGRAIIPANKRHMLEPCVIGRNFLTKVNIANSAVASSIEBEVYKQVWATMWGADTI

$\alpha 7$   $\beta 8$   $\alpha 8$   $\eta 1$   $\alpha 9$   $\beta 9$  TT

A.thaliana 260 270 280 290 300 310 320

A.thaliana MDLSTGRHETREWIILRNSAVPVGTVPIYQALEKVDGIAENLNWEVFRDTLIEAQEQGVDFYFTTHAGVL  
T.halophila MDLSTGRHETREWIILRNSAVPVGTVPIYQALEKVDGIAENLNWEVFRDTLIEAQEQGVDFYFTTHAGVL  
P.trichocarpa MDLSTGRHETREWIILRNSAVPVGTVPIYQALEKVDGIAENLNWEVFRDTLIEAQEQGVDFYFTTHAGVL  
O.satiba MDLSTGRHETREWIILRNSAVPVGTVPIYQALEKVDGIAENLNWEVFRDTLIEAQEQGVDFYFTTHAGVL  
Z.mays MDLSTGRHETREWIILRNSAVPVGTVPIYQALEKVDGIAENLNWEVFRDTLIEAQEQGVDFYFTTHAGVL  
L.japonicus MDLSTGRHETREWIILRNSAVPVGTVPIYQALEKVDGIAENLNWEVFRDTLIEAQEQGVDFYFTTHAGVL  
P.patens MDLSTGRHETREWIILRNSAVPVGTVPIYQALEKVDGIAENLNWEVFRDTLIEAQEQGVDFYFTTHAGVL  
P.tricornutum MDLSTGRHETREWIILRNSAVPVGTVPIYQALEKVDGIAENLNWEVFRDTLIEAQEQGVDFYFTTHAGVL  
V.spinolum MDLSTGRHETREWIILRNSAVPVGTVPIYQALEKVDGIAENLNWEVFRDTLIEAQEQGVDFYFTTHAGVL  
B.subtilis MDLSTGRHETREWIILRNSAVPVGTVPIYQALEKVDGIAENLNWEVFRDTLIEAQEQGVDFYFTTHAGVL  
H.boliviensis MDLSTGRHETREWIILRNSAVPVGTVPIYQALEKVDGIAENLNWEVFRDTLIEAQEQGVDFYFTTHAGVL  
Burkholderia.sp. MDLSTGRHETREWIILRNSAVPVGTVPIYQALEKVDGIAENLNWEVFRDTLIEAQEQGVDFYFTTHAGVL  
P.stutzeri MDLSTGRHETREWIILRNSAVPVGTVPIYQALEKVDGIAENLNWEVFRDTLIEAQEQGVDFYFTTHAGVL  
A.baumannii MDLSTGRHETREWIILRNSAVPVGTVPIYQALEKVDGIAENLNWEVFRDTLIEAQEQGVDFYFTTHAGVL  
E.coli MDLSTGRHETREWIILRNSAVPVGTVPIYQALEKVDGIAENLNWEVFRDTLIEAQEQGVDFYFTTHAGVL  
S.enterica MDLSTGRHETREWIILRNSAVPVGTVPIYQALEKVDGIAENLNWEVFRDTLIEAQEQGVDFYFTTHAGVL  
F.bacterium MDLSTGRHETREWIILRNSAVPVGTVPIYQALEKVDGIAENLNWEVFRDTLIEAQEQGVDFYFTTHAGVL  
A.tumefaciens MDLSTGRHETREWIILRNSAVPVGTVPIYQALEKVDGIAENLNWEVFRDTLIEAQEQGVDFYFTTHAGVL  
C.crescentus MDLSTGRHETREWIILRNSAVPVGTVPIYQALEKVDGIAENLNWEVFRDTLIEAQEQGVDFYFTTHAGVL  
S.viridis MDLSTGRHETREWIILRNSAVPVGTVPIYQALEKVDGIAENLNWEVFRDTLIEAQEQGVDFYFTTHAGVL  
H.ochraceum MDLSTGRHETREWIILRNSAVPVGTVPIYQALEKVDGIAENLNWEVFRDTLIEAQEQGVDFYFTTHAGVL  
L.licerasiae MDLSTGRHETREWIILRNSAVPVGTVPIYQALEKVDGIAENLNWEVFRDTLIEAQEQGVDFYFTTHAGVL  
V.carteri MDLSTGRHETREWIILRNSAVPVGTVPIYQALEKVDGIAENLNWEVFRDTLIEAQEQGVDFYFTTHAGVL

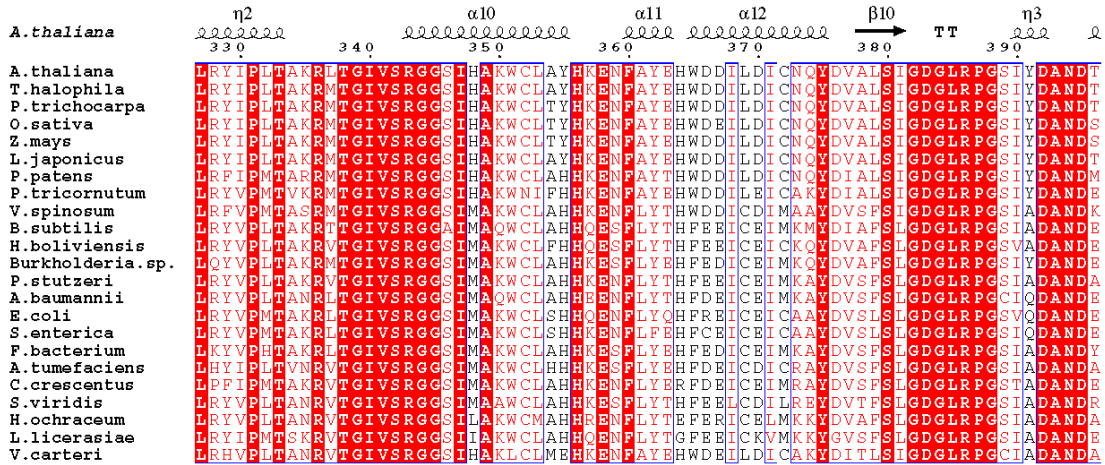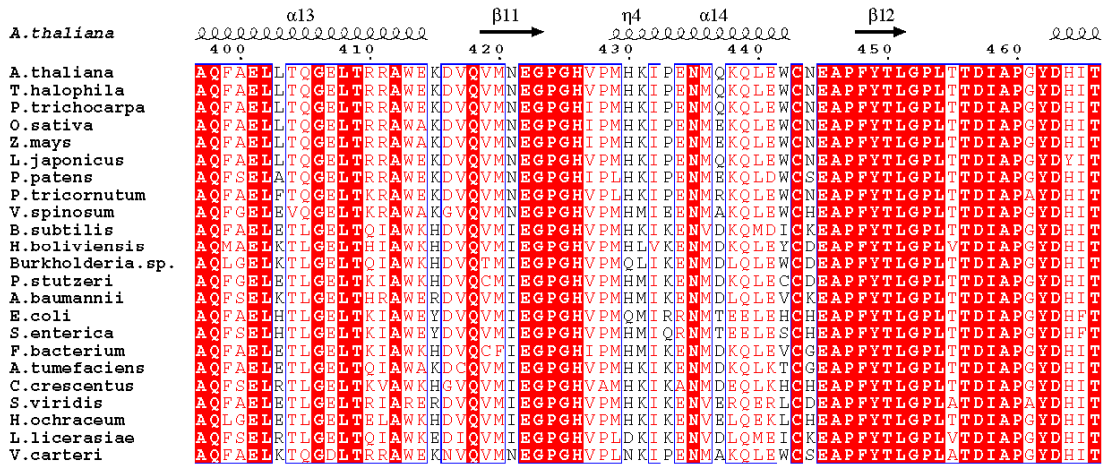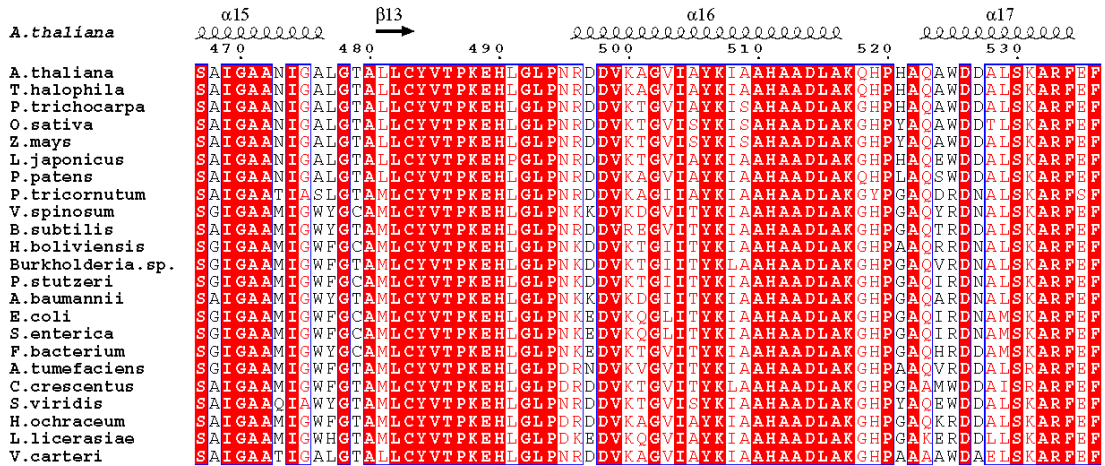

*A. thaliana*                    α18                    α19  
                                  000000                    0000000  
                                  540                    550                    560                    570                    580                    590

|                          |     |    |       |     |    |     |    |     |     |    |    |     |     |     |    |    |    |    |    |    |    |    |    |    |    |     |     |
|--------------------------|-----|----|-------|-----|----|-----|----|-----|-----|----|----|-----|-----|-----|----|----|----|----|----|----|----|----|----|----|----|-----|-----|
| <i>A. thaliana</i>       | RWM | DQ | FALS  | LDP | MT | AMS | FH | DEL | LP  | AD | GA | KVA | HFC | SM  | CG | PK | PC | SM | KI | TE | DI | RY | AE | EN | GY | ... |     |
| <i>T. halophila</i>      | RWM | DQ | FALS  | LDP | MT | AMS | FH | DEL | LP  | AD | GA | KVA | HFC | SM  | CG | PK | PC | SM | KI | TE | DI | RY | AE | EN | GY | ... |     |
| <i>P. trichocarpa</i>    | RWM | DQ | FALS  | LDP | MT | AMS | FH | DEL | LP  | SE | GA | KVA | HFC | SM  | CG | PK | PC | SM | KI | TE | DI | RY | AE | EN | GY | ... |     |
| <i>O. sativa</i>         | RWL | DQ | FALS  | LDP | VT | AMS | FH | DEL | LP  | SE | GA | KVA | HFC | SM  | CG | PK | PC | SM | KI | TE | DI | RY | AE | EN | GY | ... |     |
| <i>Z. mays</i>           | RWL | DQ | FALS  | LDP | VT | AMA | FH | DEL | LP  | SE | GA | KVA | HFC | SM  | CG | PK | PC | SM | KI | TE | DI | RY | AE | EN | GY | ... |     |
| <i>L. japonicus</i>      | RWM | DQ | FALS  | LDP | MT | AMS | FH | DEL | LP  | SE | GA | KVA | HFC | SM  | CG | PK | PC | SM | KI | TE | DI | RY | AE | EN | GY | ... |     |
| <i>P. patens</i>         | RWR | DQ | FALS  | LDP | VT | ALS | FH | DEL | LP  | AE | GA | KVA | HFC | SM  | CG | PK | PC | SM | KI | TE | DI | RY | AE | EN | GY | ... |     |
| <i>P. tricornutum</i>    | RWN | DQ | FNIS  | LDP | VT | ARE | FH | DEL | LD  | SD | AA | KS  | HFC | SM  | CG | PK | PC | SM | KI | TE | DI | RY | AE | EN | GY | ... |     |
| <i>V. spinosum</i>       | RWE | DQ | FNLS  | LDP | TT | ARE | FH | DEL | LP  | Q  | EA | KA  | HFC | SM  | CG | PK | PC | SM | KI | TE | DI | RY | AE | EN | GY | ... |     |
| <i>P. subtilis</i>       | RWR | DQ | FNLS  | LDP | ER | ALE | FH | DEL | LP  | AE | GA | KA  | HFC | SM  | CG | PK | PC | SM | KI | TE | DI | RY | AE | EN | GY | ... |     |
| <i>H. boliviensis</i>    | RWE | DQ | FNLG  | LDP | DT | ARE | FH | DEL | LP  | K  | DS | AK  | VA  | HFC | SM | CG | PK | PC | SM | KI | TE | DI | RY | AE | EN | GY  | ... |
| <i>Burkholderia. sp.</i> | RWE | DQ | FNLG  | LDP | DT | ARE | FH | DEL | LP  | K  | DS | AK  | VA  | HFC | SM | CG | PK | PC | SM | KI | TE | DI | RY | AE | EN | GY  | ... |
| <i>P. stutzeri</i>       | RWE | DQ | FNLG  | LDP | DT | ARE | FH | DEL | LP  | K  | ES | AK  | VA  | HFC | SM | CG | PK | PC | SM | KI | TE | DI | RY | AE | EN | GY  | ... |
| <i>A. baumannii</i>      | RWD | DQ | FNLS  | LDP | DT | ARS | M  | H   | DEL | LP | AE | GA  | KA  | HFC | SM | CG | PK | PC | SM | KI | TE | DI | RY | AE | EN | GY  | ... |
| <i>E. coli</i>           | RWE | DQ | FNLAL | LDP | FT | ARE | FH | DEL | LP  | Q  | ES | KA  | VA  | HFC | SM | CG | PK | PC | SM | KI | TE | DI | RY | AE | EN | GY  | ... |
| <i>S. enterica</i>       | RWE | DQ | FNLAL | LDP | FT | ARE | FH | DEL | LP  | Q  | ES | KA  | VA  | HFC | SM | CG | PK | PC | SM | KI | TE | DI | RY | AE | EN | GY  | ... |
| <i>F. bacterium</i>      | RWE | DQ | FNLAL | LDP | DT | ARE | FH | DEL | LP  | AD | NA | KA  | VA  | HFC | SM | CG | PK | PC | SM | KI | TE | DI | RY | AE | EN | GY  | ... |
| <i>A. tumefaciens</i>    | RWE | DQ | FNLS  | LDP | DT | ARS | FH | DEL | LP  | K  | EA | KA  | VA  | HFC | SM | CG | PK | PC | SM | KI | TE | DI | RY | AE | EN | GY  | ... |
| <i>C. crescentus</i>     | RWE | DQ | FNLG  | LDP | ET | ARE | FH | DEL | LP  | K  | EA | KA  | VA  | HFC | SM | CG | PK | PC | SM | KI | TE | DI | RY | AE | EN | GY  | ... |
| <i>S. viridis</i>        | RWN | DQ | FNLS  | LDP | DT | ARS | FH | DEL | LP  | AE | PA | KA  | VA  | HFC | SM | CG | PK | PC | SM | KI | TE | DI | RY | AE | EN | GY  | ... |
| <i>H. ochraceum</i>      | RWD | DQ | FNLS  | LDP | DT | ARE | FH | DEL | LP  | AE | PA | KA  | VA  | HFC | SM | CG | PK | PC | SM | KI | TE | DI | RY | AE | EN | GY  | ... |
| <i>L. licerasiae</i>     | RWD | DQ | FALS  | LDP | DT | ARS | FH | DEL | LP  | Q  | DR | KA  | VA  | HFC | SM | CG | PK | PC | SM | KI | TE | DI | RY | AE | EN | GY  | ... |
| <i>V. carteri</i>        | RWY | DQ | FALS  | LDP | VT | ARE | FH | DEL | LP  | Q  | EA | KA  | VA  | HFC | SM | CG | PK | PC | SM | KI | TE | DI | RY | AE | EN | GY  | ... |

\* \* \*

*A. thaliana*

|                          |        |     |     |     |     |    |    |    |    |      |    |     |    |    |    |    |    |    |      |      |     |     |      |      |      |      |   |   |      |   |   |      |   |
|--------------------------|--------|-----|-----|-----|-----|----|----|----|----|------|----|-----|----|----|----|----|----|----|------|------|-----|-----|------|------|------|------|---|---|------|---|---|------|---|
|                          | 600    | 610 | 620 | 630 | 640 |    |    |    |    |      |    |     |    |    |    |    |    |    |      |      |     |     |      |      |      |      |   |   |      |   |   |      |   |
| <i>A. thaliana</i>       | ..SABE | AI  | RC  | MD  | AM  | SE | EF | NI | AK | KT   | IS | GE  | QH | GE | VG | GE | IY | LP | ES   | YV   | KAA | QK  | .... |      |      |      |   |   |      |   |   |      |   |
| <i>T. halophila</i>      | ..TABE | AV  | RR  | GM  | EA  | MS | EE | NV | AK | KTI  | IS | GE  | QH | GE | VG | GE | IY | LP | EN   | YV   | KAA | LK  | .... |      |      |      |   |   |      |   |   |      |   |
| <i>P. trichocarpa</i>    | ..NAEE | AV  | Q   | GM  | DA  | MS | AE | FL | AA | RKTI | IS | GE  | QH | GE | VG | GE | IY | LP | AS   | YI   | SS  | SR  | .... |      |      |      |   |   |      |   |   |      |   |
| <i>O. sativa</i>         | ..TVEE | AV  | I   | GM  | NA  | MS | AE | FL | AA | RKTI | IS | GE  | QH | GE | AG | GE | IY | VP | ES   | Y    | T   | ARK | .... |      |      |      |   |   |      |   |   |      |   |
| <i>Z. mays</i>           | ..TVEE | AV  | I   | GM  | NA  | MS | AE | FL | AA | RKXI | IS | GE  | QH | GE | AG | GE | IY | VP | ES   | Y    | AA  | QK  | .... |      |      |      |   |   |      |   |   |      |   |
| <i>L. japonicus</i>      | ..TAE  | E   | AL  | IR  | GM  | DA | MS | AE | F  | Q    | SA | KT  | VS | GE | QH | GE | AG | GE | IY   | LP   | AS  | Y   | LS   | SK   | E    | K    | Q | L | K    | Q | G |      |   |
| <i>P. patens</i>         | ..EAE  | AA  | I   | K   | GM  | DK | MS | RE | F  | LA   | AK | KTI | IS | GE | Q  | W  | GE | S  | GE   | GE   | IY  | LP  | ES   | Y    | V    | A    | S | K | L    | P | T | P    | S |
| <i>P. tricornutum</i>    | ..VEE  | T   | AA  | K   | GM  | ET | MS | EL | Y  | K    | EL | GN  | KL | YV | E  | D  | E  | K  | T    | Y    | E   | N   | T    | F    | N    | L    | K | D | L    | A | S | .... |   |
| <i>V. spinosum</i>       | ..EE   | E   | AL  | K   | V   | GM | AK | KS | KE | F    | VE | AG  | AE | V  | Y  | N  | P  | A  | .... |      |     |     |      |      |      |      |   |   |      |   |   |      |   |
| <i>B. subtilis</i>       | ..EAE  | A   | I   | N   | K   | L  | K  | L  | K  | E    | K  | E   | F  | V  | D  | T  | G  | S  | N    | L    | Y   | Q   | .... |      |      |      |   |   |      |   |   |      |   |
| <i>H. boliviensis</i>    | ..GDQ  | E   | AV  | M   | K   | GM | EE | Q  | A  | E    | K  | F   | R  | Q  | K  | G  | S  | E  | L    | Y    | Q   | E   | V    | .... |      |      |   |   |      |   |   |      |   |
| <i>Burkholderia. sp.</i> | ..DDE  | A   | L   | K   | K   | GM | E  | V  | K  | S    | I  | E   | F  | M  | K  | K  | G  | A  | E    | I    | Y   | Q   | R    | .... |      |      |   |   |      |   |   |      |   |
| <i>P. stutzeri</i>       | ..DEQ  | K   | A   | I   | E   | A  | G  | F  | A  | E    | Q  | S   | R  | F  | K  | D  | G  | S  | V    | I    | Y   | K   | Q    | V    | .... |      |   |   |      |   |   |      |   |
| <i>A. baumannii</i>      | ..NSD  | S   | E   | V   | E   | B  | L  | K  | A  | M    | K  | E   | V  | Y  | Q  | E  | Q  | Q  | L    | Y    | H   | K   | V    | .... |      |      |   |   |      |   |   |      |   |
| <i>E. coli</i>           | ..AAQ  | T   | I   | E   | V   | GM | AD | MS | EN | F    | R  | A   | R  | G  | G  | B  | I  | Y  | L    | R    | K   | E   | E    | A    | .... |      |   |   |      |   |   |      |   |
| <i>S. enterica</i>       | ..AAQ  | A   | I   | E   | V   | GM | AD | MS | EN | F    | R  | A   | K  | G  | G  | B  | I  | Y  | L    | K    | R   | E   | E    | V    | .... |      |   |   |      |   |   |      |   |
| <i>F. bacterium</i>      | ..TEE  | A   | L   | E   | GM  | K  | A  | S  | E  | B    | F  | K   | H  | G  | S  | E  | V  | Y  | L    | .... |     |     |      |      |      |      |   |   |      |   |   |      |   |
| <i>A. tumefaciens</i>    | ..K    | E   | G   | L   | E   | A  | M  | A  | A  | R    | F  | K   | E  | G  | G  | E  | L  | Y  | M    | P    | L   | A   | T    | P    | A    | D    | G | Q | .... |   |   |      |   |
| <i>C. crescentus</i>     | ..APN  | S   | A   | E   | L   | GM | A  | E  | M  | S    | E  | K   | F  | R  | E  | Q  | G  | S  | E    | I    | Y   | L   | K    | T    | E    | .... |   |   |      |   |   |      |   |
| <i>S. viridis</i>        | ..SVE  | A   | I   | E   | GM  | R  | E  | K  | S  | R    | E  | F   | T  | E  | K  | G  | G  | V  | Y    | L    | P   | V   | V    | D    | R    | .... |   |   |      |   |   |      |   |
| <i>H. ochraceum</i>      | ..EDE  | A   | V   | R   | GM  | E  | H  | K  | A  | A    | E  | F   | R  | E  | Q  | G  | K  | R  | L    | Y    | A   | E   | T    | E    | S    | .... |   |   |      |   |   |      |   |
| <i>L. licerasiae</i>     | ..DEK  | A   | M   | B   | G   | F  | K  | E  | K  | S    | E  | E   | F  | L  | N  | K  | G  | G  | T    | V    | Y   | V   | S    | S    | E    | .... |   |   |      |   |   |      |   |
| <i>V. carteri</i>        | DAD    | L   | I   | A   | A   | A  | Q  | B  | GM | K    | T  | M   | S  | D  | E  | F  | K  | R  | G    | A    | E   | L   | Y    | H    | .... |      |   |   |      |   |   |      |   |



**Supplementary Table 1.**

| ICP-MS Multi-element quantitation |                    |                   |                   |                   |                    |
|-----------------------------------|--------------------|-------------------|-------------------|-------------------|--------------------|
| Sample                            | Concentration unit | Mg                | Fe                | Ni                | Zn                 |
| $\Delta$ N71-AtTHIC               | mg/L               | < LOQ             | 17.91 $\pm$ 0.72  | 4.85 $\pm$ 0.10   | 4.17 $\pm$ 0.29    |
|                                   | mM                 | < LOQ             | 0.321 $\pm$ 0.01  | 0.083 $\pm$ 0.00  | 0.064 $\pm$ 0.00   |
| Buffer                            | $\mu$ g/L          | 92.70 $\pm$ 3.70  | 44.5 $\pm$ 8.60   | 6.10 $\pm$ 0.90   | 107.40 $\pm$ 17.60 |
|                                   | mM                 | 0.004 $\pm$ 0.000 | 0.001 $\pm$ 0.000 | 0.000 $\pm$ 0.000 | 0.002 $\pm$ 0.000  |
